# Supplementary material for: A daily-updated tree of (sequenced) life as a reference for genome research
Source: PubMed Central journal article supplement — Sci Rep. 2013 Jun 18;3:2015. doi: 10.1038/srep02015 (PMC6504836; doi:10.1038/srep02015), 2013-06-18
Supplement: srep02015-s1.pdf [file srep02015-s1.pdf]

## Supplementary Information

### **A daily-updated tree of (sequenced) life as a reference for genome research**

Hai Fang<sup>1,\*</sup>, Matt Oates<sup>1</sup>, Ralph Pethica<sup>1</sup>, Jenny Greenwood<sup>2</sup>, Adam Sardar<sup>1</sup>, Owen Rackham<sup>1</sup>, Alexandros Stamatakis<sup>3</sup>, David A. de Lima Morais<sup>1,4</sup> & Julian Gough<sup>1,\*</sup>

<sup>1</sup>Department of Computer Science, University of Bristol, The Merchant Venturers Building, Bristol BS8 1UB, UK; <sup>2</sup>School of Earth Sciences, University of Bristol, Wills Memorial Building, Bristol BS8 1RJ, UK; <sup>3</sup>The Exelixis Lab, Scientific Computing Group, Heidelberg Institute for Theoretical Studies, Schloss-Wolfsbrunnengasse 35, D-69118, Heidelberg, Germany; <sup>4</sup>Centre de Calcul Scientifique, Université de Sherbrooke, Sherbrooke, Quebec J1K 2R1, Canada.

\*Correspondence and requests for materials should be addressed to J.G. ([gough@cs.bris.ac.uk](mailto:gough@cs.bris.ac.uk)) or H.F. ([hfang@cs.bris.ac.uk](mailto:hfang@cs.bris.ac.uk)).

This supplementary information includes two supplementary figures.

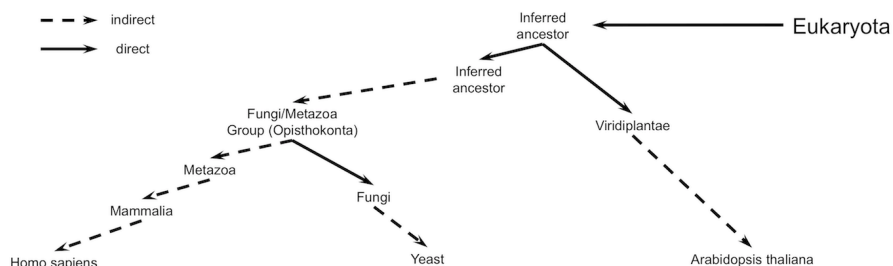

| SCOP id <sup>a</sup><br>(sunid)                                                                           | SCOP description <sup>a</sup>                                              | Homo sapiens<br>[9606 <sup>b</sup> ] | Mammalia<br>[40674 <sup>b</sup> ] | Metazoa<br>[33208 <sup>b</sup> ] | Fungi/Metazoa<br>group [33154 <sup>b</sup> ] | Fungi<br>[4751 <sup>b</sup> ] | Yeast<br>[4932 <sup>b</sup> ] | Inferred<br>ancestor | Inferred<br>ancestor | Viridiplantae<br>[33090 <sup>b</sup> ] | Arabidopsis thaliana<br>[3702 <sup>b</sup> ] | Eukaryota<br>[2759 <sup>b</sup> ] |
|-----------------------------------------------------------------------------------------------------------|----------------------------------------------------------------------------|--------------------------------------|-----------------------------------|----------------------------------|----------------------------------------------|-------------------------------|-------------------------------|----------------------|----------------------|----------------------------------------|----------------------------------------------|-----------------------------------|
| <b>Histone-lysine N-methyltransferase (2.1.1.43) from Enzyme Commission (EC)<sup>c</sup></b>              |                                                                            |                                      |                                   |                                  |                                              |                               |                               |                      |                      |                                        |                                              |                                   |
| 48403                                                                                                     | Ankyrin repeat                                                             | 1                                    | 1                                 | 1                                | 1                                            | 1                             | 1                             | 1                    | 1                    | 1                                      | 1                                            | 1                                 |
| 57667                                                                                                     | beta-beta-alpha zinc fingers                                               | 1                                    | 1                                 | 1                                | 1                                            | 1                             | 1                             | 1                    | 1                    | 1                                      | 1                                            | 1                                 |
| 47370                                                                                                     | Bromodomain                                                                | 1                                    | 1                                 | 1                                | 1                                            | 1                             | 1                             | 1                    | 1                    | 1                                      | 1                                            | 1                                 |
| 54160                                                                                                     | Chromo domain-like                                                         | 1                                    | 1                                 | 1                                | 1                                            | 1                             | 1                             | 1                    | 1                    | 1                                      | 1                                            | 1                                 |
| 47676                                                                                                     | Conserved domain common to transcription factors TFIIIS, elongin A, CRSP70 | 1                                    | 1                                 | 1                                | 1                                            | 1                             | 1                             | 1                    | 1                    | 1                                      | 1                                            | 0                                 |
| 54171                                                                                                     | DNA-binding domain                                                         | 1                                    | 1                                 | 1                                | 1                                            | 1                             | 0                             | 1                    | 1                    | 1                                      | 1                                            | 0                                 |
| 57903                                                                                                     | FYVE/PHD zinc finger                                                       | 1                                    | 1                                 | 1                                | 1                                            | 1                             | 1                             | 1                    | 1                    | 1                                      | 1                                            | 1                                 |
| 82185                                                                                                     | Histone H3 K4-specific methyltransferase SET7/9 N-terminal domain          | 1                                    | 1                                 | 1                                | 1                                            | 1                             | 0                             | 1                    | 1                    | 1                                      | 1                                            | 1                                 |
| 47095                                                                                                     | HMG-box                                                                    | 1                                    | 1                                 | 1                                | 1                                            | 1                             | 1                             | 1                    | 1                    | 1                                      | 1                                            | 1                                 |
| 109640                                                                                                    | KRAB domain (Kruppel-associated box)                                       | 1                                    | 1                                 | 0                                | 0                                            | 0                             | 0                             | 0                    | 0                    | 0                                      | 0                                            | 0                                 |
| 88697                                                                                                     | PUA domain-like                                                            | 1                                    | 1                                 | 1                                | 1                                            | 1                             | 1                             | 1                    | 1                    | 1                                      | 1                                            | 1                                 |
| 54928                                                                                                     | RNA-binding domain, RBD                                                    | 1                                    | 1                                 | 1                                | 1                                            | 1                             | 1                             | 1                    | 1                    | 1                                      | 1                                            | 1                                 |
| 81822                                                                                                     | RuBisCo LSMT C-terminal, substrate-binding domain                          | 1                                    | 1                                 | 1                                | 1                                            | 1                             | 0                             | 1                    | 1                    | 1                                      | 1                                            | 1                                 |
| 82199                                                                                                     | SET domain                                                                 | 1                                    | 1                                 | 1                                | 1                                            | 1                             | 1                             | 1                    | 1                    | 1                                      | 1                                            | 1                                 |
| 48452                                                                                                     | TPR-like                                                                   | 1                                    | 1                                 | 1                                | 1                                            | 1                             | 1                             | 1                    | 1                    | 1                                      | 1                                            | 1                                 |
| 63748                                                                                                     | Tudor/PWWP/MBT                                                             | 1                                    | 1                                 | 1                                | 1                                            | 1                             | 1                             | 1                    | 1                    | 1                                      | 1                                            | 1                                 |
| 51045                                                                                                     | WW domain                                                                  | 1                                    | 1                                 | 1                                | 1                                            | 1                             | 1                             | 1                    | 1                    | 1                                      | 1                                            | 0                                 |
|                                                                                                           | <b>Total:</b>                                                              | <b>17</b>                            | <b>17</b>                         | <b>16</b>                        | <b>16</b>                                    | <b>16</b>                     | <b>13</b>                     | <b>16</b>            | <b>16</b>            | <b>16</b>                              | <b>16</b>                                    | <b>13</b>                         |
| <b>Oxidation (KW:0558) from the Post-Translational Modification KeyWord (KW) in UniProtKB<sup>d</sup></b> |                                                                            |                                      |                                   |                                  |                                              |                               |                               |                      |                      |                                        |                                              |                                   |
| 53067                                                                                                     | Actin-like ATPase domain                                                   | 1                                    | 1                                 | 1                                | 1                                            | 1                             | 1                             | 1                    | 1                    | 1                                      | 1                                            | 1                                 |
| 58113                                                                                                     | Apolipoprotein A-I                                                         | 1                                    | 1                                 | 1                                | 1                                            | 1                             | 1                             | 1                    | 1                    | 1                                      | 1                                            | 1                                 |
| 82936                                                                                                     | Apolipoprotein A-II                                                        | 1                                    | 0                                 | 0                                | 0                                            | 0                             | 0                             | 0                    | 0                    | 0                                      | 0                                            | 0                                 |
| 52317                                                                                                     | Class I glutamine amidotransferase-like                                    | 1                                    | 1                                 | 1                                | 1                                            | 1                             | 1                             | 1                    | 1                    | 1                                      | 1                                            | 1                                 |
| 57038                                                                                                     | Cyclotides                                                                 | 0                                    | 0                                 | 0                                | 0                                            | 0                             | 0                             | 0                    | 0                    | 0                                      | 0                                            | 0                                 |
| 51905                                                                                                     | FAD/NAD(P)-binding domain                                                  | 1                                    | 1                                 | 1                                | 1                                            | 1                             | 1                             | 1                    | 1                    | 1                                      | 1                                            | 1                                 |
| 55424                                                                                                     | FAD/NAD-linked reductases, dimerisation (C-terminal) domain                | 1                                    | 1                                 | 1                                | 1                                            | 1                             | 1                             | 1                    | 1                    | 1                                      | 1                                            | 1                                 |
| 49695                                                                                                     | gamma-Crystallin-like                                                      | 1                                    | 1                                 | 1                                | 1                                            | 1                             | 0                             | 1                    | 1                    | 1                                      | 0                                            | 1                                 |
| 49764                                                                                                     | HSP20-like chaperones                                                      | 1                                    | 1                                 | 1                                | 1                                            | 1                             | 1                             | 1                    | 1                    | 1                                      | 1                                            | 1                                 |
| 56209                                                                                                     | Nitrile hydratase alpha chain                                              | 0                                    | 0                                 | 0                                | 1                                            | 1                             | 0                             | 1                    | 1                    | 0                                      | 0                                            | 1                                 |
|                                                                                                           | <b>Total:</b>                                                              | <b>8</b>                             | <b>8</b>                          | <b>7</b>                         | <b>8</b>                                     | <b>8</b>                      | <b>6</b>                      | <b>8</b>             | <b>8</b>             | <b>7</b>                               | <b>6</b>                                     | <b>8</b>                          |
| <b>Hormone metabolism (UPA00437) from UniPathway (UP)<sup>e</sup></b>                                     |                                                                            |                                      |                                   |                                  |                                              |                               |                               |                      |                      |                                        |                                              |                                   |
| 46785                                                                                                     | Winged helix DNA-binding domain                                            | 1                                    | 1                                 | 1                                | 1                                            | 1                             | 1                             | 1                    | 1                    | 1                                      | 1                                            | 1                                 |
| 55729                                                                                                     | Acyl-CoA N-acyltransferases (Nat)                                          | 1                                    | 1                                 | 1                                | 1                                            | 1                             | 1                             | 1                    | 1                    | 1                                      | 1                                            | 1                                 |
| 75304                                                                                                     | Amidase signature (AS) enzymes                                             | 1                                    | 1                                 | 1                                | 1                                            | 1                             | 1                             | 1                    | 1                    | 1                                      | 1                                            | 1                                 |
| 51197                                                                                                     | Clavaminate synthase-like                                                  | 1                                    | 1                                 | 1                                | 1                                            | 1                             | 1                             | 1                    | 1                    | 1                                      | 1                                            | 1                                 |
| 57535                                                                                                     | Complement control module/SCR domain                                       | 1                                    | 1                                 | 1                                | 1                                            | 0                             | 0                             | 1                    | 1                    | 1                                      | 0                                            | 0                                 |
| 48264                                                                                                     | Cytochrome P450                                                            | 1                                    | 1                                 | 1                                | 1                                            | 1                             | 1                             | 1                    | 1                    | 1                                      | 1                                            | 1                                 |
| 47473                                                                                                     | EF-hand                                                                    | 1                                    | 1                                 | 1                                | 1                                            | 1                             | 1                             | 1                    | 1                    | 1                                      | 1                                            | 1                                 |
| 57196                                                                                                     | EGF/Laminin                                                                | 1                                    | 1                                 | 1                                | 1                                            | 0                             | 1                             | 1                    | 1                    | 1                                      | 1                                            | 0                                 |
| 54373                                                                                                     | FAD-linked reductases, C-terminal domain                                   | 1                                    | 1                                 | 1                                | 1                                            | 1                             | 1                             | 1                    | 1                    | 1                                      | 1                                            | 1                                 |
| 51905                                                                                                     | FAD/NAD(P)-binding domain                                                  | 1                                    | 1                                 | 1                                | 1                                            | 1                             | 1                             | 1                    | 1                    | 1                                      | 1                                            | 1                                 |
| 52343                                                                                                     | Ferredoxin reductase-like, C-terminal NADP-linked domain                   | 1                                    | 1                                 | 1                                | 1                                            | 1                             | 1                             | 1                    | 1                    | 1                                      | 1                                            | 1                                 |
| 48113                                                                                                     | Heme-dependent peroxidases                                                 | 1                                    | 1                                 | 1                                | 1                                            | 1                             | 1                             | 1                    | 1                    | 1                                      | 1                                            | 1                                 |
| 51735                                                                                                     | NAD(P)-binding Rossmann-fold domains                                       | 1                                    | 1                                 | 1                                | 1                                            | 1                             | 1                             | 1                    | 1                    | 1                                      | 1                                            | 1                                 |
| 53383                                                                                                     | PLP-dependent transferases                                                 | 1                                    | 1                                 | 1                                | 1                                            | 1                             | 1                             | 1                    | 1                    | 1                                      | 1                                            | 1                                 |
| 63380                                                                                                     | Riboflavin synthase domain-like                                            | 1                                    | 1                                 | 1                                | 1                                            | 1                             | 1                             | 1                    | 1                    | 1                                      | 1                                            | 1                                 |
| 53335                                                                                                     | S-adenosyl-L-methionine-dependent methyltransferases                       | 1                                    | 1                                 | 1                                | 1                                            | 1                             | 1                             | 1                    | 1                    | 1                                      | 1                                            | 1                                 |
| 49879                                                                                                     | SMAD/FHA domain                                                            | 1                                    | 1                                 | 1                                | 1                                            | 1                             | 1                             | 1                    | 1                    | 1                                      | 1                                            | 1                                 |
| 48239                                                                                                     | Terpenoid cyclases/Protein prenyltransferases                              | 1                                    | 1                                 | 1                                | 1                                            | 1                             | 1                             | 1                    | 1                    | 1                                      | 1                                            | 1                                 |
| 48576                                                                                                     | Terpenoid synthases                                                        | 1                                    | 1                                 | 1                                | 1                                            | 1                             | 1                             | 1                    | 1                    | 1                                      | 1                                            | 1                                 |
| 53756                                                                                                     | UDP-Glycosyltransferase/glycogen phosphorylase                             | 1                                    | 1                                 | 1                                | 1                                            | 1                             | 1                             | 1                    | 1                    | 1                                      | 1                                            | 1                                 |
|                                                                                                           | <b>Total:</b>                                                              | <b>20</b>                            | <b>20</b>                         | <b>20</b>                        | <b>20</b>                                    | <b>19</b>                     | <b>18</b>                     | <b>20</b>            | <b>20</b>            | <b>20</b>                              | <b>19</b>                                    | <b>18</b>                         |

<sup>a</sup> A list of *superfamilies* annotated by the term as indicated below.

<sup>b</sup> NCBI Taxonomy identifiers.

<sup>c</sup> Available at <http://supfam.org/SUPERFAMILY/cgi-bin/dco.cgi?type=EC;po=2.1.1.43;focus=SUPRA>.

<sup>d</sup> Available at <http://supfam.org/SUPERFAMILY/cgi-bin/dco.cgi?type=KW;po=KW:0558;focus=SUPRA>.

<sup>e</sup> Available at <http://supfam.org/SUPERFAMILY/cgi-bin/dco.cgi?type=UP;po=UPA00437;focus=SUPRA>.

**Figure S1. The exemplified use of sTOL for studying the evolution of enzymes, post-translational modifications and metabolism.** The diagram in the top panel shows the paths covering three kingdoms. The bottom panel lists the details of their presence (1) and absence (0) patterns at the major branching points of eukaryotic evolution.

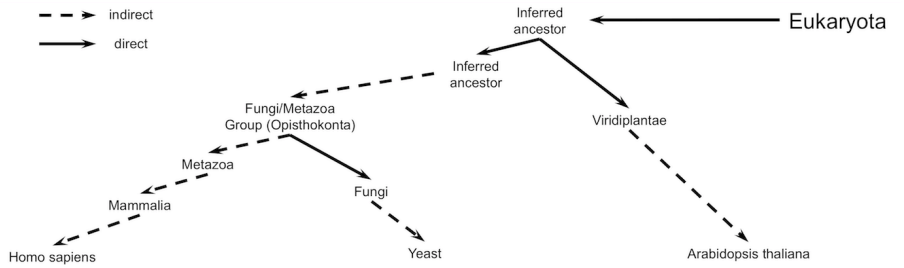

| SCOP id <sup>a</sup><br>(sunid)                                                         | SCOP Term <sup>a</sup>                                   | Homo sapiens<br>[9606 <sup>b</sup> ] | Mammalia<br>[40674 <sup>b</sup> ] | Metazoa<br>[33208 <sup>b</sup> ] | Fungi/Metazoa<br>group [33154 <sup>b</sup> ] | Fungi<br>[4751 <sup>b</sup> ] | Yeast<br>[4932 <sup>b</sup> ] | Inferred<br>ancestor | Inferred<br>ancestor | Viridiplantae<br>[33090 <sup>b</sup> ] | Arabidopsis thaliana<br>[3702 <sup>b</sup> ] | Eukaryota<br>[2759 <sup>b</sup> ] |
|-----------------------------------------------------------------------------------------|----------------------------------------------------------|--------------------------------------|-----------------------------------|----------------------------------|----------------------------------------------|-------------------------------|-------------------------------|----------------------|----------------------|----------------------------------------|----------------------------------------------|-----------------------------------|
| <i>Proto-oncogene (KW:0656) from the Disease KeyWord (KW) in UniprotKB<sup>d</sup></i>  |                                                          |                                      |                                   |                                  |                                              |                               |                               |                      |                      |                                        |                                              |                                   |
| 46785                                                                                   | Winged helix DNA-binding domain                          | 1                                    | 1                                 | 1                                | 1                                            | 1                             | 1                             | 1                    | 1                    | 1                                      | 1                                            | 1                                 |
| 47454                                                                                   | A DNA-binding domain in eukaryotic transcription factors | 1                                    | 1                                 | 1                                | 1                                            | 0                             | 0                             | 0                    | 0                    | 0                                      | 0                                            | 0                                 |
| 103657                                                                                  | BAR/IMD domain-like                                      | 1                                    | 1                                 | 1                                | 1                                            | 1                             | 1                             | 1                    | 1                    | 1                                      | 1                                            | 1                                 |
| 81955                                                                                   | beta-sandwich domain of Sec23/24                         | 1                                    | 1                                 | 1                                | 1                                            | 1                             | 1                             | 1                    | 1                    | 1                                      | 1                                            | 1                                 |
| 54277                                                                                   | CAD & PB1 domains                                        | 1                                    | 1                                 | 1                                | 1                                            | 1                             | 1                             | 1                    | 1                    | 1                                      | 1                                            | 0                                 |
| 57889                                                                                   | Cysteine-rich domain                                     | 1                                    | 1                                 | 1                                | 1                                            | 1                             | 1                             | 1                    | 1                    | 1                                      | 1                                            | 1                                 |
| 50353                                                                                   | Cytokine                                                 | 1                                    | 1                                 | 1                                | 1                                            | 1                             | 0                             | 1                    | 1                    | 1                                      | 1                                            | 0                                 |
| 48065                                                                                   | DBL homology domain (DH-domain)                          | 1                                    | 1                                 | 1                                | 1                                            | 1                             | 1                             | 1                    | 1                    | 0                                      | 0                                            | 1                                 |
| 81296                                                                                   | E set domains                                            | 1                                    | 1                                 | 1                                | 1                                            | 1                             | 1                             | 1                    | 1                    | 1                                      | 1                                            | 1                                 |
| 47459                                                                                   | HLH, helix-loop-helix DNA-binding domain                 | 1                                    | 1                                 | 1                                | 1                                            | 1                             | 1                             | 1                    | 1                    | 1                                      | 1                                            | 1                                 |
| 48726                                                                                   | Immunoglobulin                                           | 1                                    | 1                                 | 1                                | 1                                            | 0                             | 0                             | 1                    | 1                    | 1                                      | 0                                            | 1                                 |
| 57959                                                                                   | Leucine zipper domain                                    | 1                                    | 1                                 | 1                                | 1                                            | 1                             | 1                             | 1                    | 1                    | 1                                      | 1                                            | 1                                 |
| 50729                                                                                   | PH domain-like                                           | 1                                    | 1                                 | 1                                | 1                                            | 1                             | 1                             | 1                    | 1                    | 1                                      | 1                                            | 1                                 |
| 103575                                                                                  | Plexin repeat                                            | 1                                    | 1                                 | 1                                | 1                                            | 0                             | 0                             | 1                    | 0                    | 0                                      | 0                                            | 0                                 |
| 56112                                                                                   | Protein kinase-like (PK-like)                            | 1                                    | 1                                 | 1                                | 1                                            | 1                             | 1                             | 1                    | 1                    | 1                                      | 1                                            | 1                                 |
| 46955                                                                                   | Putative DNA-binding domain                              | 1                                    | 1                                 | 1                                | 1                                            | 1                             | 1                             | 1                    | 1                    | 1                                      | 1                                            | 1                                 |
| 90209                                                                                   | Ran binding protein zinc finger-like                     | 1                                    | 1                                 | 1                                | 1                                            | 1                             | 1                             | 1                    | 1                    | 1                                      | 1                                            | 1                                 |
| 47769                                                                                   | SAM/Pointed domain                                       | 1                                    | 1                                 | 1                                | 1                                            | 1                             | 1                             | 1                    | 1                    | 1                                      | 1                                            | 0                                 |
| 63763                                                                                   | SAND domain-like                                         | 1                                    | 1                                 | 1                                | 1                                            | 0                             | 0                             | 1                    | 1                    | 1                                      | 1                                            | 0                                 |
| 101912                                                                                  | Scma domain                                              | 1                                    | 1                                 | 1                                | 0                                            | 0                             | 0                             | 0                    | 0                    | 0                                      | 0                                            | 0                                 |
| 55550                                                                                   | SH2 domain                                               | 1                                    | 1                                 | 1                                | 1                                            | 1                             | 1                             | 1                    | 1                    | 1                                      | 1                                            | 0                                 |
| 50044                                                                                   | SH3-domain                                               | 1                                    | 1                                 | 1                                | 1                                            | 1                             | 1                             | 1                    | 1                    | 1                                      | 1                                            | 1                                 |
| 54236                                                                                   | Ubiquitin-like                                           | 1                                    | 1                                 | 1                                | 1                                            | 1                             | 1                             | 1                    | 1                    | 1                                      | 1                                            | 1                                 |
| 51045                                                                                   | WW domain                                                | 1                                    | 1                                 | 1                                | 1                                            | 1                             | 1                             | 1                    | 1                    | 1                                      | 1                                            | 0                                 |
|                                                                                         | <b>Total:</b>                                            | <b>24</b>                            | <b>24</b>                         | <b>24</b>                        | <b>23</b>                                    | <b>19</b>                     | <b>18</b>                     | <b>22</b>            | <b>21</b>            | <b>20</b>                              | <b>19</b>                                    | <b>15</b>                         |
| <i>Oncogene (KW:0553) from the Disease KeyWord (KW) in UniprotKB<sup>d</sup></i>        |                                                          |                                      |                                   |                                  |                                              |                               |                               |                      |                      |                                        |                                              |                                   |
| 46565                                                                                   | Chaperone J-domain                                       | 1                                    | 1                                 | 1                                | 1                                            | 1                             | 1                             | 1                    | 1                    | 1                                      | 1                                            | 1                                 |
| 56672                                                                                   | DNA/RNA polymerases                                      | 1                                    | 1                                 | 1                                | 1                                            | 1                             | 1                             | 1                    | 1                    | 1                                      | 1                                            | 1                                 |
| 161229                                                                                  | E6 C-terminal domain-like                                | 0                                    | 0                                 | 0                                | 0                                            | 0                             | 0                             | 0                    | 0                    | 0                                      | 0                                            | 0                                 |
| 161234                                                                                  | E7 C-terminal domain-like                                | 0                                    | 0                                 | 0                                | 0                                            | 0                             | 0                             | 0                    | 0                    | 0                                      | 0                                            | 0                                 |
| 55464                                                                                   | Origin of replication-binding domain, RBD-like           | 0                                    | 0                                 | 0                                | 1                                            | 1                             | 0                             | 1                    | 1                    | 1                                      | 0                                            | 0                                 |
| 52540                                                                                   | P-loop containing nucleoside triphosphate hydrolases     | 1                                    | 1                                 | 1                                | 1                                            | 1                             | 1                             | 1                    | 1                    | 1                                      | 1                                            | 1                                 |
| 56112                                                                                   | Protein kinase-like (PK-like)                            | 1                                    | 1                                 | 1                                | 1                                            | 1                             | 1                             | 1                    | 1                    | 1                                      | 1                                            | 1                                 |
| 55550                                                                                   | SH2 domain                                               | 1                                    | 1                                 | 1                                | 1                                            | 1                             | 1                             | 1                    | 1                    | 1                                      | 1                                            | 0                                 |
| 161240                                                                                  | T-antigen specific domain-like                           | 0                                    | 0                                 | 0                                | 0                                            | 0                             | 0                             | 0                    | 0                    | 0                                      | 0                                            | 0                                 |
| 50494                                                                                   | Trypsin-like serine proteases                            | 1                                    | 1                                 | 1                                | 1                                            | 1                             | 1                             | 1                    | 1                    | 1                                      | 1                                            | 1                                 |
|                                                                                         | <b>Total:</b>                                            | <b>6</b>                             | <b>6</b>                          | <b>6</b>                         | <b>7</b>                                     | <b>7</b>                      | <b>6</b>                      | <b>7</b>             | <b>7</b>             | <b>7</b>                               | <b>6</b>                                     | <b>5</b>                          |
| <i>Embryonic lethality (MP:0008762) from Mouse/Mammalian Phenotype (MP)<sup>f</sup></i> |                                                          |                                      |                                   |                                  |                                              |                               |                               |                      |                      |                                        |                                              |                                   |
| 55729                                                                                   | Acyl-CoA N-acyltransferases (Nat)                        | 1                                    | 1                                 | 1                                | 1                                            | 1                             | 1                             | 1                    | 1                    | 1                                      | 1                                            | 1                                 |
| 75632                                                                                   | Cullin homology domain                                   | 1                                    | 1                                 | 1                                | 1                                            | 1                             | 1                             | 1                    | 1                    | 1                                      | 1                                            | 1                                 |
| 55979                                                                                   | DNA clamp                                                | 1                                    | 1                                 | 1                                | 1                                            | 1                             | 1                             | 1                    | 1                    | 1                                      | 1                                            | 1                                 |
| 52029                                                                                   | GroEL apical domain-like                                 | 1                                    | 1                                 | 1                                | 1                                            | 1                             | 1                             | 1                    | 1                    | 1                                      | 1                                            | 1                                 |
| 81901                                                                                   | HCP-like                                                 | 1                                    | 1                                 | 1                                | 1                                            | 1                             | 1                             | 1                    | 1                    | 1                                      | 1                                            | 1                                 |
| 49417                                                                                   | p53-like transcription factors                           | 1                                    | 1                                 | 1                                | 1                                            | 1                             | 1                             | 0                    | 0                    | 0                                      | 0                                            | 0                                 |
| 56366                                                                                   | SMAD MH1 domain                                          | 1                                    | 1                                 | 1                                | 0                                            | 0                             | 0                             | 0                    | 0                    | 0                                      | 0                                            | 0                                 |
|                                                                                         | <b>Total:</b>                                            | <b>7</b>                             | <b>7</b>                          | <b>7</b>                         | <b>6</b>                                     | <b>6</b>                      | <b>6</b>                      | <b>5</b>             | <b>5</b>             | <b>5</b>                               | <b>5</b>                                     | <b>5</b>                          |

<sup>a</sup> A list of superfamilies annotated by the term as indicated below.

<sup>b</sup> NCBI Taxonomy identifiers.

<sup>c</sup> Available at <http://supfam.org/SUPERFAMILY/cgi-bin/dco.cgi?type=KW;po=KW:0656;focus=SUPRA>.

<sup>d</sup> Available at <http://supfam.org/SUPERFAMILY/cgi-bin/dco.cgi?type=KW;po=KW:0553;focus=SUPRA>.

<sup>e</sup> Available at <http://supfam.org/SUPERFAMILY/cgi-bin/dco.cgi?type=MP;po=MP:0008762;focus=SUPRA>.

**Figure S2. The exemplified use of sTOL for studying the evolution of diseases and phenotypes.**

The diagram in the top panel shows the paths covering three kingdoms. The bottom panel lists the details of their presence (1) and absence (0) patterns at the major branching points of eukaryotic evolution.
